# Supplementary material
Source: PubMed Central journal article supplement (PMC3044077)
Supplement: supp_214_6_1007__1.pdf [file supp_214_6_1007__1.pdf]

|                                  | <u>Intact</u> |           |           | <u>4 weeks post-injury</u> |           |           | <u>10 weeks post-injury</u> |           |           | <u>Total</u> |
|----------------------------------|---------------|-----------|-----------|----------------------------|-----------|-----------|-----------------------------|-----------|-----------|--------------|
|                                  | <u>Ds</u>     | <u>Lv</u> | <u>Us</u> | <u>Ds</u>                  | <u>Lv</u> | <u>Us</u> | <u>Ds</u>                   | <u>Lv</u> | <u>Us</u> |              |
| Number of avg'd Sol EMG profiles | 8             | +8        | +8        | +3                         | +3        | +3        | +3                          | +3        | +3        | =42          |
| Number of avg'd TA EMG profiles  | 8             | +8        | +8        | +3                         | +3        | +3        | +3                          | +3        | +3        | =42          |
| Grand total = 84                 |               |           |           |                            |           |           |                             |           |           |              |

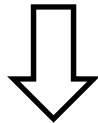

PCA data set includes 84 EMG profiles

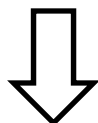

Each EMG profile is assigned a loading value based on its correlation to the regression line representing the principle component

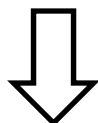

|                                           |   |    |    |    |    |    |    |    |    |                     |
|-------------------------------------------|---|----|----|----|----|----|----|----|----|---------------------|
| Number of Sol PC Loadings that were avg'd | 8 | +8 | +8 | +3 | +3 | +3 | +3 | +3 | +3 | <u>Total</u><br>=42 |
| Number of TA PC Loadings that were avg'd  | 8 | +8 | +8 | +3 | +3 | +3 | +3 | +3 | +3 | =42                 |
| Grand total = 84                          |   |    |    |    |    |    |    |    |    |                     |
